# Supplementary material for: IL-4 enhances IL-10 production in Th1 cells: implications for Th1 and Th2 regulation
Source: PubMed Central journal article supplement (PMC5595963; doi:10.1038/s41598-017-11803-y), 2017-09-12
Supplement: 41598_2017_11803_MOESM1_ESM.pdf [file 41598_2017_11803_MOESM1_ESM.pdf]

**IL-4 enhances IL-10 production in Th1 cells: implications for Th1 and Th2 regulation**

Ruth E. Mitchell<sup>1;2</sup>, Masriana Hassan<sup>1;3</sup>, Bronwen R. Burton<sup>1;4</sup>, Graham Britton<sup>1;5</sup>,  
Elaine V. Hill<sup>1</sup>, Johan Verhagen<sup>1;6</sup>, David C. Wraith<sup>1;7</sup> \*

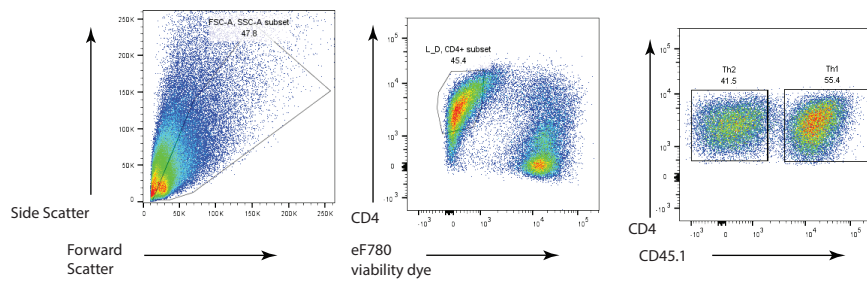

### Supplementary Figure S1: CD4+ T cell gating strategy

An example is shown of the FACS gating strategy used. Lymphocytes were gated in a FSC/SSC plot as indicated and live CD4<sup>+</sup> cells within this population were gated in a CD4-Alexa700 / eF780 viability dye plot as indicated. If in a co-culture of Th1 and Th2 cells, cells were gated on CD45.1<sup>+</sup> cells to identify the Th1 cells. These cells were then further analysed for intracellular cytokines or transcription factors.

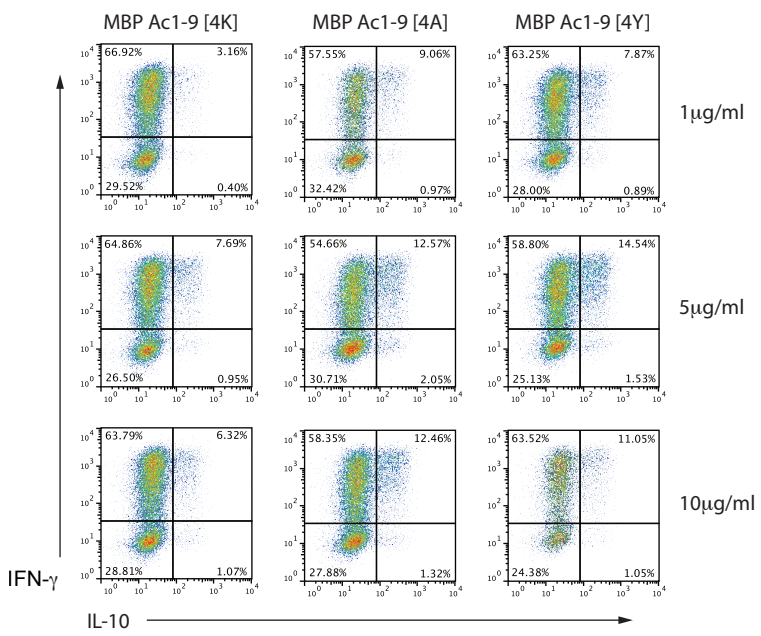

Supplementary Figure S2: The affinity and dose of peptide determine the differentiation of IL-10 secreting CD4<sup>+</sup> cells

Splenic Tg4 CD4<sup>+</sup> T cells were cultured in the presence of irradiated B10.PL splenocytes as APCs and MBP Ac1-9 peptide affinity variants (MBP Ac1-9[4A], MBP Ac1-9[4K], MBP Ac1-9[4Y]) at a number of different concentrations (1 μg, 5 μg, 10 μg). Intracellular cytokine staining was carried out on day 7 of the second stimulation, following PMA and ionomycin stimulation. FACS plots from a single experiment are gated on live CD4<sup>+</sup> cells and show IFN-γ, IL-4 and IL-10 expression.
